# Supplementary material
Source: MDPI journal article supplement (https://www.mdpi.com/2311-5637/9/11/978)
Supplement: s1 [file s1]

# Biochemical Characterization of a Novel Alkaline-Tolerant Xaa-Pro Dipeptidase from *Aspergillus phoenicis*

Zixing Dong <sup>1,\*†</sup>, Shuangshuang Yang<sup>2,†</sup>, Kun Zhang<sup>1</sup>, Cunduo Tang <sup>1,3</sup>, Yunchao Kan <sup>1,3</sup> and Lunguang Yao<sup>1,4,\*</sup>

<sup>1</sup> Henan Provincial Engineering Laboratory of Insect Bio-Reactor, College of Life Science and Agricultural Engineering, Nanyang Normal University, Nanyang 473061, China

<sup>2</sup> College of Physical Education, Nanyang Normal University, Nanyang 473061, China

<sup>3</sup> China-UK-NYNU-RRes Joint Laboratory of Insect Biology, Henan Key Laboratory of Insect Biology in Funiu Mountain, Nanyang Normal University, Nanyang 473061, China

<sup>4</sup> Henan Provincial Engineering and Technology Center of Health Products for Livestock and Poultry, Nanyang Normal University, Nanyang 473061, China

\* Correspondence: dzx@nynu.edu.cn (Z.D.); 20081063@nynu.edu.cn (L.Y.); Tel.: +86-0377-63525087 (Z.D.)

† These authors contributed equally to this work.

**Table S1.** Xaa-Pro dipeptidases that were characterized by molecular and/or biochemical techniques.

| Enzyme                           | Organism                                                | GenBank<br>accession No. | Optimum pH<br>and<br>temperature | pH stability and<br>thermostability                                                             | Monomer/Multi<br>mer (MW of<br>subunits, or<br>native enzymes)<br><sup>a</sup> | Inhibitor<br>(cofactor) <sup>b</sup>                             | Substrate specificity <sup>c</sup>                                                                                                                                   | Referen<br>ce  |
|----------------------------------|---------------------------------------------------------|--------------------------|----------------------------------|-------------------------------------------------------------------------------------------------|--------------------------------------------------------------------------------|------------------------------------------------------------------|----------------------------------------------------------------------------------------------------------------------------------------------------------------------|----------------|
| <b>Hyperthermophilic archaea</b> |                                                         |                          |                                  |                                                                                                 |                                                                                |                                                                  |                                                                                                                                                                      |                |
| PfPEPQ                           | <i>Pyrococcus furiosus</i><br>DSM 3638                  | P81535.1                 | pH 7.0, 100 °C                   | Half-life at 100 °C for<br>native and<br>recombinant enzymes<br>is 4 h and 1 h,<br>respectively | Homodimer (39.4<br>kDa, 100±10 kDa)                                            | EDTA, Zn <sup>2+</sup><br>(Co <sup>2+</sup> , Mn <sup>2+</sup> ) | Xaa-Pro (Xaa=Met, Leu, Val,<br>Phe or Ala)                                                                                                                           | [25,35,5<br>0] |
| PhPROL                           | <i>P. horikoshii</i> OT3                                | BAA30249.1               | pH 7.0, 100 °C                   | Half-life at 90 °C is<br>21.5 h                                                                 | 39.27 kDa, NA                                                                  | Zn <sup>2+</sup> (Co <sup>2+</sup> )                             | Met-Pro, Leu-Pro, and<br>organophosphorus nerve<br>agents                                                                                                            | [34,51]        |
| <b>Eubacteria</b>                |                                                         |                          |                                  |                                                                                                 |                                                                                |                                                                  |                                                                                                                                                                      |                |
| AhOPA<br>A                       | <i>Alteromonas</i><br><i>haloplanktis</i> ATCC<br>23821 | P77814.1                 | pH 7.5, 40 °C                    | ND <sup>a</sup>                                                                                 | Monomer (50<br>kDa, NA)                                                        | DFP analog<br>Nipafox, pCMB,<br>NEM (Mn <sup>2+</sup> )          | Xaa-Pro and OP compounds                                                                                                                                             | [45]           |
| AmOPA<br>A                       | <i>A. macleodii</i><br>NCIMN1963                        | AEI26268.1               |                                  |                                                                                                 | Dimer (50.6 kDa,<br>101.2 kDa)                                                 | cofactor: Mn <sup>2+</sup>                                       | Xaa-Pro and OP compounds                                                                                                                                             | [9]            |
| AsOPA<br>A                       | <i>Alteromonas</i> sp.<br>JD6.5                         | Q44238.3                 | pH 8.5, 50 °C                    |                                                                                                 | Monomer (60<br>kDa, 60 kDa)                                                    | pCMB, IAA,<br>NEM, EGTA,<br>Zn <sup>2+</sup> (Mn <sup>2+</sup> ) | DFP, NPMPP, NPEPP,<br>paraaxon, and nerve agents<br>such as sarin, soman, and<br>O-cyclohexyl<br>methylphosphonofluoridate;<br>Xaa-Pro dipeptides such as<br>Gly-Pro | [38,52,53<br>] |
| AuOPA                            | <i>A. undina</i> ATCC                                   |                          | pH 8.0, 55 °C                    |                                                                                                 | Monomer (53                                                                    | IAA, EGTA,                                                       | A wide range of nerve                                                                                                                                                | [54]           |

|         |                                                         |                    |                            |                                                                                           |                               |                                                                                                                                                     |                                                                                                                                      |            |
|---------|---------------------------------------------------------|--------------------|----------------------------|-------------------------------------------------------------------------------------------|-------------------------------|-----------------------------------------------------------------------------------------------------------------------------------------------------|--------------------------------------------------------------------------------------------------------------------------------------|------------|
| A       | 29660                                                   |                    |                            |                                                                                           | kDa, 53 kDa)                  | NEM, Ni <sup>2+</sup> and Zn <sup>2+</sup> (Mn <sup>2+</sup> )                                                                                      | agents and several chromogenic phosphinates                                                                                          |            |
| DrXPD   | <i>Deinococcus radiodurans</i> R1                       | WP_02747955<br>3.1 |                            |                                                                                           | Dimer (45 kDa, NA)            | cofactor: Mn <sup>2+</sup>                                                                                                                          | Xaa-Pro                                                                                                                              | [43]       |
| EcPEPQ  | <i>Escherichia coli</i> BL21 (DE3)                      | P21165.2           | pH 8.0, 60 °C              | Incubation at 4-30 °C for 10 min (> 80%), incubation at pH 7.0-9.0 for 1 h (30 °C, > 60%) | Dimer                         | cofactor: Mn <sup>2+</sup>                                                                                                                          | Xaa-Pro dipeptides, DFP, organophosphate diesters and triesters, and nerve agents GB (sarin), GD (soman), GF, and VX                 | [37,47,55] |
| LcXPD   | <i>Lactobacillus casei</i> subsp. <i>casei</i> IFPL 731 |                    | pH 6.5-7.5, 55 °C          | Retain 36% activity after incubation at 30°C for 30 min                                   | Monomer (41 kDa, 41 kDa)      | EDTA and 1,10-phenanthroline, DTT, ME, pHMB and IAA , Cu <sup>2+</sup> , Zn <sup>2+</sup> , Fe <sup>3+</sup> (Mn <sup>2+</sup> , Co <sup>2+</sup> ) | Hydrolyze Xaa-Pro, Ala-Ala, and Ala-Phe except for Pro-Pro and Gly-Pro                                                               | [40]       |
| LdPEPQ  | <i>L. delbrueckii</i> subsp. <i>bulgaricus</i> CNRZ 397 | CAA73815.1         | pH 6.0, 50 °C              |                                                                                           | Homodimer (45 kDa, 68-70 kDa) | Bestatin, DTT, EDTA (Zn <sup>2+</sup> )                                                                                                             | Hydrolyzes Xaa-Pro dipeptides except for Pro-Pro and Gly-Pro                                                                         | [26]       |
| LIXPDI  | <i>Lactococcus lactis</i> subsp. <i>cremoris</i> AM2    |                    | 8.3–9.0 (universal buffer) |                                                                                           | NA, 42 kDa                    | NEM, benzamidine, bestatin, bacitracin, PMSF, pCMB, IAA, leupeptin                                                                                  | Xaa-Pro, Pro-Pro, Pro-Ala, Pro-Val, etc.                                                                                             | [56]       |
| LIXPDII | <i>L. lactis</i> NRRL B-1821                            | ABW84230.1         | pH 7.0, 40-50 °C           | Incubation at 20-50 °C for 30 min (> 60%)                                                 | Dimer (40 kDa, 80 kDa)        | cofactor: Zn <sup>2+</sup>                                                                                                                          | Leu-Pro, Arg-Pro, Val-Pro, Phe-Pro, and Lys-Pro; does not hydrolyze Gly-Pro, Glu-Pro, Asp-Pro, Pro-Pro, Leu-Leu-Pro, and Leu-Val-Pro | [42]       |
| MtXPD   | <i>Mycobacterium</i>                                    | P9WHS7.1           | pH 7.5–8.0, 55             | Completely lost its                                                                       |                               | Phosphate ion,                                                                                                                                      | Hydrolyze only dipeptides,                                                                                                           | [4]        |

|        |                                                                |              |                   |                                                                                                                                                                                                                           |                               |                                                                                                                                                |                                                                                                                                         |         |
|--------|----------------------------------------------------------------|--------------|-------------------|---------------------------------------------------------------------------------------------------------------------------------------------------------------------------------------------------------------------------|-------------------------------|------------------------------------------------------------------------------------------------------------------------------------------------|-----------------------------------------------------------------------------------------------------------------------------------------|---------|
|        | <i>tuberculosis</i> H37Rv                                      |              | °C                | activity at 50°C and 65°C in the absence and presence of 1 mM Mn <sup>2+</sup> , respectively<br>Incubation at pH 5.0-8.0 for 2 h (> 60%);<br>half-lives at 55, 60 and 65 °C are 88.87, 78.77 and 33.49 min, respectively |                               | cacodylate                                                                                                                                     | but failed to cleave tripeptides or long chain peptides like bradykinin                                                                 |         |
| PIOPAA | <i>Pseudoalteromonas lipolytica</i> SCSIO04301                 | WP_036973676 | pH 8.5, 55 °C     |                                                                                                                                                                                                                           | Tetramer (53 kDa, 200 kDa)    | EDTA, Ca <sup>2+</sup> , Mg <sup>2+</sup> , Co <sup>2+</sup> , Ni <sup>2+</sup> , Fe <sup>3+</sup> (Mn <sup>2+</sup> )                         | Gly-Pro shows a preference for oxon-phosphoryl than thiono-phosphoryl, hydrolyzes dichlorvos, methyl-paraoxon, paraoxon, and profenofos | [13,39] |
| ScXPD  | <i>Streptococcus cremoris</i> H61                              |              | pH 6.5-7.5, 40 °C | Quickly lose activity at temperatures above 40 °C                                                                                                                                                                         | Monomer (NA, 43 kDa)          | EDTA and 1,10-phenanthroline, pCMB, NEM, ME, Zn <sup>2+</sup> , Cu <sup>2+</sup> , Hg <sup>2+</sup> , Fe <sup>2+</sup> (Co <sup>2+</sup> )     | Xaa-Pro, e.g., Leu-Pro                                                                                                                  | [41]    |
| TsPROL | <i>Thermococcus sibiricus</i> MM 739                           | ACS89882.1   |                   |                                                                                                                                                                                                                           | Homodimer (39 kDa, 70-75 kDa) | cofactor: Zn <sup>2+</sup>                                                                                                                     |                                                                                                                                         | [57,58] |
| XcXPD  | <i>Xanthomonas campestris</i> pv. <i>campestris</i> ATCC 33913 | Q8P839       | pH 7.5–8.0, 55 °C | Completely lost its activity at 60 °C and 80 °C in the absence and presence of 1 mM Mn <sup>2+</sup> , respectively                                                                                                       | Dimer                         | Phosphate ion, cacodylate (Mn <sup>2+</sup> )                                                                                                  | Hydrolyze only dipeptides, but failed to cleave tripeptides or long chain peptides like bradykinin                                      | [4,33]  |
| XmXPD  | <i>X. maltophilia</i>                                          |              | pH 7.5, 35 °C     | pH 6.0-8.5; half-life at 37 °C is 60 min                                                                                                                                                                                  | Dimer (51 kDa, 100 kDa)       | pCMB, o-phenanthroline, Z-L-proline, and phenylacetyl-thio proline, Cu <sup>2+</sup> , Zn <sup>2+</sup> , Hg <sup>2+</sup> (Mn <sup>2+</sup> ) | Xaa-Pro, e.g., Leu-Pro                                                                                                                  | [59]    |

| Eukarya     |                                      |            |               |                           |                                 |                                                      |                                                                                                        |            |
|-------------|--------------------------------------|------------|---------------|---------------------------|---------------------------------|------------------------------------------------------|--------------------------------------------------------------------------------------------------------|------------|
| AnPEPP      | <i>Aspergillus nidulans</i><br>WG312 | CAC39600.1 | pH 7.0        | Stable at 40°C for 60 min | Homodimer (58 kDa, 125 kDa)     | cofactor: Mn <sup>2+</sup>                           | Met-Pro, Ala-Pro, Phe-Pro, Leu-Pro, and Val-Pro; could not hydrolyze Pro-Ala, Ala-Ala, and Ala-Pro-Gly | [16]       |
| HsPEPD<br>I | <i>Homo sapiens</i>                  | AAA60064.1 | pH 7.8, 50 °C | 37 °C for at least 8 days | Dimer (54 kDa, NA) <sup>c</sup> | Cbz-Pro, guanidine hydrochloride (Mn <sup>2+</sup> ) | Gly-Pro>Ala-Pro>Phe-Pro>Leu-Pro, DFP, sarin, soman, tabun, and cyclosarin                              | [34,46,60] |

ND, not determined; NA, not available.

<sup>a</sup> Molecular weight of subunits and native enzymes were determined by SDS-PAGE and gel filtration, respectively;

<sup>b</sup>pCMB, *p*-chloromercuribenzoic acid; IAA, iodoacetic acid; EDTA, ethylenediaminetetraacetic acid; EGTA, ethylene glycol-bis(β-aminoethyl ether)-N,N,N',N'-tetraacetic acid; pHMB, *p*-hydrocymercuribenzoic acid; NEM, *N*-ethylmaleimide; DTT, dithiothreitol; ME, β-mercaptoethanol

<sup>c</sup> DFP, diisopropylfluorophosphate; NPMPP, *p*-nitrophenylmethyl(phenyl)phosphinate; NPEPP, *p*-nitrophenylethyl(phenyl)phosphinate; GF, *O*-cyclohexylmethylphosphonofluoridate; VX, *S*-2(diisopropylamino)ethyl *O*-ethyl methylphosphonothioate; OP compounds, organophosphate compounds.

|           |                                                              |    |
|-----------|--------------------------------------------------------------|----|
| PfPEPQ    | - - - - -                                                    | 1  |
| PhPROL    | - - - - -                                                    | 1  |
| TsPROL    | - - - - -                                                    | 1  |
| LIXPDII   | - - - - -                                                    | 1  |
| LdPEPQ    | - - - - -                                                    | 1  |
| MtXPD     | - - - - -                                                    | 1  |
| XcXPD     | - - - - -                                                    | 1  |
| ApXPD     | MLDKQTESLPLAEEIPLLRQPPHQHRKTVLRFITGAGLLLLTIYTLFPRLSPFTSIKQPL | 60 |
| DrXPP     | - - - - -                                                    | 1  |
| AnPEPP    | - - - - -MQAALHRTEIKAP                                       | 13 |
| HsPEPDI   | - - - - -                                                    | 1  |
| EcPEPQ    | - - - - -                                                    | 1  |
| AnOPAA    | - - - - -                                                    | 1  |
| AsOPAA    | - - - - -                                                    | 1  |
| AhOPAA    | - - - - -                                                    | 1  |
| PIOPAA    | - - - - -                                                    | 1  |
| Consensus | - - - - -                                                    | 1  |

|           |                                                                     |     |
|-----------|---------------------------------------------------------------------|-----|
|           |                                                                     |     |
| PfPEPQ    | - - - - -MKERLEKLVKFMDENSIDRVFIAKPV                                 | 26  |
| PhPROL    | - - - - -MDIMNEKVKKIIIEFMDKNSIDAVLIAKNP                             | 29  |
| TsPROL    | - - - - -MDYKRRIHKKFQAHFGKKGFEGALVAPGS                              | 28  |
| LIXPDII   | - - - - -MSKIERISAFLLNDKEVDMFTITNPT                                 | 25  |
| LdPEPQ    | - - - - -MNLDKLQNWQENGMDVAVVSSPT                                    | 24  |
| MtXPD     | - - - - -MGSRRFDAEVYARRLALAAAATADAGLAGLVITPGY                       | 36  |
| XcXPD     | - - - - -MSTQIGGMSLDQARTQLAPWTQRAAPIGADEYQQRIERARVLMRAQGVDAALLIGAGT | 57  |
| ApXPD     | SVSPYSEFERCSIENLRQTGYFFLDATPIAVEEFNERRNRLARALVADGADAFVVEPGY         | 120 |
| DrXPP     | - - - - -MSTPIPAMQAALAAATDLGWLVDYDFQ                                | 26  |
| AnPEPP    | HRPTRLALSNLFTARNRIAMTSLDSILADKYPAKAHARRVAEGLKALGHSGGAIYLEAQKT       | 73  |
| HsPEPDI   | - - - - -MAAATGSPFWLGNETLKVPLALFALNRQRLCERLRKNPAVQAGSIVVLQGGEE      | 53  |
| EcPEPQ    | - - - - -MESLASLYKNHIATLQERTDALARFKLD                               | 29  |
| AnOPAA    | - - - - -MSQHKATYQQHIEELQARTREALQREGLD                              | 29  |
| AsOPAA    | - - - - -MNKLAVLYAEHIAITLQKRTREIERENLD                              | 29  |
| AhOPAA    | - - - - -MEKLAVLYAEHIAITLQQRTRTICEQEGLE                             | 29  |
| PIOPAA    | - - - - -MDKLAVLYAEHIAITLQQRTRTITEREGLE                             | 29  |
| Consensus | - - - - -                                                           | 29  |

|           |                                                                            |     |
|-----------|----------------------------------------------------------------------------|-----|
|           |                                                                            |     |
| PfPEPQ    | NVYYFSG - - - - TSPLGGGY - - - - IIVDGDEATLYVPELEY - - EMAKE - ESKLPVVKFKK | 74  |
| PhPROL    | NVYYISG - - - - ASPLAGGY - - - - ILITGESATLYVPELEY - - EMAKE - ESNIPVEKFKK | 77  |
| TsPROL    | NFYLTG - - - - FNPLGTLERLFVLILPSEGLLTAIAPRLY - - EKELE - EFNGEVVLWSD       | 80  |
| LIXPDII   | TLNYLTG - - - - LAIDPHERIAGLMIFRDS TPMLFTPALV - - EKAKEHTSGLDIFGYED        | 78  |
| LdPEPQ    | TINYFTG - - - - FITDPEERIFKLFAFKDAEPFLFCPALNY - - EEAKASAWDGDVVGGLD        | 77  |
| MtXPD     | DLCYLIGSR - - - - AETFERLTALVLAAGAPAVVLPRLAAL - KQSAAEGLGLRVDWVD           | 92  |
| XcXPD     | SLRYFSG - - - - VPWGASERLVALLLTTEGDPVLICPAFEEG - QSDAVLQLPVRKRLWEE         | 111 |
| ApXPD     | TFKYFANVSQPEWEVWEPEERPFPLMVVQPYRHSSGHVTAKTT - FLAPSFEAERARLLNMP            | 179 |
| DrXPP     | GLNPHARRVLGIGDDVFLTRFFVWVPRAGRAVVLHNNHIEGGNWNRIITQEWDAELRPFGS              | 86  |
| AnPEPP    | RLIEDNDP - - - - VFRQRRPFFYL SGCLLPDSSLVYNIDSD - QLTLFIPPINPDVIEWS         | 128 |
| HsPEPDI   | TQRYCTDTG - - - - VLFLQESFFHWAFGVTEPGCYGVIDVDTGKSTL FVPRLPASHATWMG         | 109 |
| EcPEPQ    | ALLIHSGL - - - - FNVFLDDHPPYFVKVNPQFKAWVPVTQVPN - - CWLLVDGYNKPKLWFYL      | 84  |
| AnOPAA    | GLVIHSGQG - - - - KRLFLDDNHYPFKVNPQFKAWVPVIDNPN - - CWLVVNGVDKPTLIFYR      | 84  |
| AsOPAA    | GVVFHSGQA - - - - KRQFLDDMYYPFKVNPQFKAWLPVIDNPN - - CWIVANGTDKPKLIFYR      | 84  |
| AhOPAA    | GLVIHSGQA - - - - KRQFLDDMYYPFKVNPQFKAWLPVIDNPN - - CWIVVNGSDKPKLIFYR      | 84  |
| PIOPAA    | GLVIHSGQA - - - - KRQFLDDMYYPFKVNPQFKAWLPVIDNPN - - CWIVVDGASKPKLIFYR      | 84  |
| Consensus | - - - - -                                                                  | 84  |

|           |                                                                    |     |
|-----------|--------------------------------------------------------------------|-----|
|           |                                                                    |     |
| PfPEPQ    | FDEIYEILKN - - - - TETLGIEGT - - - - LSYSMVENFKEKSNVKEFKK -        | 113 |
| PhPROL    | MDEFYKALEG - - - - IKSLGIESS - - - - LPYGFIEELKKKANIKEFKK -        | 116 |
| TsPROL    | SENPYKIFATKIKETFKEGEKLLIDDT - - - - MPVGVFLKAKDIFDKYSLHP -         | 127 |
| LIXPDII   | SQNPWEVVKNHVKS - - - - DVKSIAVEFSID - - - - IPLAKTEGLKAQFGDINFTN - | 123 |
| LdPEPQ    | SEDPWKGIAEEIKQRTKDYQNWAVEKNG - - - - LTVAHYQALHAQFPDSDFSKD         | 126 |
| MtXPD     | GDDPYGLVSAVLGG - - - - APVATAVTD - - - - MPALHMLPLADALGVLPLVAT     | 137 |
| XcXPD     | HEDPYALVVQAMDEQHAAHALALDPG - - - - IAFAVHTGLRAHLGTAIRDAG           | 157 |
| ApXPD     | FLEPIEIPWEEHWNPDYTLKNSVIFSALDR - - - - LAPRLMVDEEMRDFIQRGLGHS      | 231 |
| DrXPP     | HAELDAALRGVVSQQLAMEYSPNGAVP - - - - YVSRVDAGTLERVRGAGAAEVA         | 136 |
| AnPEPP    | GLPLSAAEALERYDNDVLETTENVNATLANIAASHANNSTAFATAIEQVSEGTFEGFSET       | 188 |
| HsPEPDI   | KIHSKEHFKEKYAVDDVQYVDEIASVLT SQKPSVLLTLRGVNTDSGVSVCREASFDGISKF     | 169 |
| EcPEPQ    | PVDYWHNVEPLPTSFWTEDVEVIALPKADGIGSLLPAARGNIGYIGPVPERALQLGIEAS       | 144 |
| AnOPAA    | PEDFWHKVPPPEPNDFTDSFDIKLLQADAVEKFLPYDKSRFAYVGEYIEVAKALGFDN -       | 143 |
| AsOPAA    | PVDFWHKVPDEPNFYWADYFDIELLVKPDQVEKLLPYDKARFAYIGEYLEVAQALGFEL -      | 143 |
| AhOPAA    | PIDFWHKVPDEPRDFWAEYFDIELLLQPDQVEKLLPYDKAKFAYIGEYLEVAQALGFSI -      | 143 |
| PIOPAA    | PVDFWHKVPDEPRDFWAEYFDIELLVQPDQVEKLLPYDKANYAYIGEYLEVAQALGFSI -      | 143 |
| Consensus | - - - - -                                                          | 143 |

|           |                                                                 |            |            |
|-----------|-----------------------------------------------------------------|------------|------------|
|           | <b>α7</b>                                                       | <b>α8</b>  |            |
| PfPEPQ    | -----IDDDVIKDLRIIKTKEEIEIEEKACEIADKAVMAAIE-----EITEGKREREVAAK   |            | 163        |
| PhPROL    | -----VDDVIRDMRIIKSEKEIKIEEKACEIADKAVMAAIE-----EITEGKKEREVAAK    |            | 166        |
| TsPROL    | -----ISPVISELREIKDKDEIKAHKKAAEIVDKVFYRFIE-----GKLEGKSERELANR    |            | 177        |
| LIXPDII   | -----LTPLIERMRLIKSADEIEKMKVAGDFADKCFEIGFATA--AERNGVTESDIVAK     |            | 175        |
| LdPEPQ    | -----LSDFIAHIRLFKTESELVKLRKAGEEADFAFQIGFE-----ALRNGVTERAVVSQ    |            | 176        |
| MtXPD     | -----DVLRLRLRMVKEETEIDALRKAGAAIDRVHARVPE-----FLVPGRTEADVAAD     |            | 185        |
| XcXPD     | -----AIIIDGCRMCKSPAELALMQQACDMTLLVQRLAAG-----IAHEGIGTDQLVRF     |            | 205        |
| ApXPD     | GFEIVGLMGEVERVRQIKSDTEVGILRAVNTGTVEAVRQMRK-----CLYPGLTESEIASA   |            | 287        |
| DrXPP     | -----SSADLLQAFLVWTPDDLAHRRRAAALLMRAKDDAFRLIHDRLRAGQSVTEWEVQ     |            | 190        |
| AnPEPP    | -NFNVLKGVIERTRVVKDSYIEALLRKANDISAKGHIAAIK-----ASKSATNEREIEAA    |            | 242        |
| HsPEPDI   | EVNNTILHPEIVESRVFKTDMELVLRVYTNKISSEAHREVMK-----AVKVGMEYGLESL    |            | 225        |
| EcPEPQ    | NINPKGVIDYLHYYSFKTEYELACMREAQKMAVNGHRAAEE-----AFRSGMSE--FDIN    |            | 198        |
| AnOPAA    | -VNPDRVLHYLHYQRAYKTDYELDCMREANKLAVAGHKAAEQ-----AFREGKSE--FDIN   |            | 196        |
| AsOPAA    | -MNPPEVMNFYHYHRAYKTQYELACMREANKIAVQGHKAARD-----AFFQGGKSE--FEIQ  |            | 196        |
| AhOPAA    | -MNPPEVLNYIHYHRAYKTQYELECLRNANRIAVDGHKAARD-----AFFNGGSE--FDIQ   |            | 196        |
| PIOPAA    | -MNPPEVMNYLHFHRAYKTQYELECLRQANRIAVEGHKAARD-----TFFNGGSE--FDIQ   |            | 196        |
| Consensus |                                                                 |            |            |
|           | <b>α9</b>                                                       | <b>β7</b>  | <b>η2</b>  |
| PfPEPQ    | VEYLMKMN-GAEKPAFDTIIASGHRSAHPHGVASDK-----RIERG-DLVVIDLGALYN-    |            | 215        |
| PhPROL    | VEYLMKMN-GAEKPAFDTIIASGYRSALPHGVASDK-----RIERG-DLVVIDLGALYQ-    |            | 218        |
| TsPROL    | IEYMIKNEFGADDVSFEPIVASGPNGANPHHRP SHR-----KIRKG-DVVIDYGAAYL-    |            | 230        |
| LIXPDII   | IEYEMK-RMGVPQMSFDTLVLSGAANAAPHGAPENV-----EIQEN-KLLLFDLGVMMSG-   |            | 227        |
| LdPEPQ    | IEYQLKLQKGVMTSFDTIIVQAGKNAANPHQGP SMN-----TVQPN-ELVLFDLGTMHE-   |            | 229        |
| MtXPD     | IAEAIVAEGHSEV--AFVIVGSGPHGADPHHGYSDR-----ELREG-DIVVVDIGGTYGP    |            | 237        |
| XcXPD     | IDEAHRALGADNGSTFC-IVQFGHATAFPHGIPGVQ-----HLRAG-ELVLIDTGCITVQ-   |            | 257        |
| ApXPD     | LDNTLR--SAGLEPFFDIVLFDENAAANPHGGTNGS-----KVLEPETFVLIDVGAHL-     |            | 338        |
| DrXPP     | QLIMDQIRAAGMQAGHDVNVSVFGVNAADSHYEPSEQR-----SATLHPGECVLIDLWAQEPG |            | 247        |
| AnPEPP    | FIACTIAN-GAREQSYHPIVACGNGATLHYGKNDIDLDPVTNRRKDNVLIDAGAEYR-      |            | 300        |
| HsPEPDI   | FEHYCYSRGGMRHSSTYTCICGSGENSAVLHYGHAGAP--NDRTIQNGDMCLFDMGGEYY-   |            | 282        |
| EcPEPQ    | IAYLTATGHRDITDVPYSNIVALNEHAAPVHYTKLDH-----QAPPEMRSFLLIDAGAEYN-  |            | 252        |
| AnOPAA    | LAYAAASRQGDNDVPYTSIVALNEHASILHYMQCDT-----VAPKESRSFLIDAGANYH-    |            | 250        |
| AsOPAA    | QAYLLATQHSENDNAYGNIVALNENCAILHYTHFDR-----VAPATHRSFLIDAGANFN-    |            | 250        |
| AhOPAA    | QAYLMATRQSENEMPYGNIVALNENCAILHYTHFEP-----KAPQTHNSFLIDAGANFN-    |            | 250        |
| PIOPAA    | HAYLMATRQSENEMPYGNIVALNENCAILHYTHFEP-----TAPHTHHSFLIDAGANFN-    |            | 250        |
| Consensus |                                                                 |            |            |
|           | <b>β10</b>                                                      | <b>β11</b> | <b>α10</b> |
| PfPEPQ    | HYNSDITRTIVVG--SPNEKQR-----EIIYEVLEAQKRAVEAAKPGMTAK----         |            | 259        |
| PhPROL    | HYNSDITRTIVVG--SPNEKQK-----EIIYEVLEAQKKAVEAAKPGITAK----         |            | 262        |
| TsPROL    | GYCSDVTRTVVG--PPSEEVK-----KVYEVKEAQETAVQKVAEGIPAE----           |            | 274        |
| LIXPDII   | GYASDATRTIAIG--QPNDFDA-----EIHKIVKEAQQAAMDFIKPGVTAH----         |            | 271        |
| LdPEPQ    | GYASDSSRTVAYG--EPTDKMR-----EIIYEVNRTAQQAIDAAPKGMTAS----         |            | 273        |
| MtXPD     | GYHSDSTRITYSIG--EPDSDAV-----QSYSMQLQRAQRAAFEAIRPGVTAE----       |            | 281        |
| XcXPD     | GYHSDITRTWIYG--TPSDAQV-----RIWELELAQAQAFAAARPGVACE----          |            | 301        |
| ApXPD     | GYSSDICRTFFPPFLEPPTPDMTPANRLREKLEVWDIVFEAQTRSIGQFQVNASAA----    |            | 394        |
| DrXPP     | RPFADVTVWVGFAG--EPGTEYL-----DAWQAVRAAREAALELLRSRFVAEGYGR        |            | 295        |
| AnPEPP    | TYCADITRAFPLNGKFLPETR-----QIIYEVLRMQLECIDMLKEGVQWE----          |            | 345        |
| HsPEPDI   | SVASDITCSFPFRNGKFTADQKA-----VYEAVALLSRAVMGAMKPGDWWP----         |            | 327        |
| EcPEPQ    | GYAADLTRTWSAK--SDNDYA-----QLVKDVNDEQLALIAMTKAGVSYY----          |            | 295        |
| AnOPAA    | GYAADITRTYAQEGVHNSAMFR-----DLIQAVDKVTLTLVDSLKPGLVAYT----        |            | 296        |
| AsOPAA    | GYAADITRTYDFT--GEGEFA-----ELVATMKQHQIALCNQLAPGKLYG----          |            | 293        |
| AhOPAA    | GYAADITRTYDFK--KQGEFA-----DLVNAMTAHQIELGKSLKPGLLYG----          |            | 293        |
| PIOPAA    | GYAADITRTYDFK--KSGEFS-----DLIQVMTEHQIALGKALKPGLLYG----          |            | 293        |
| Consensus |                                                                 |            |            |
|           | <b>α11</b>                                                      | <b>β12</b> | <b>β13</b> |
| PfPEPQ    | ---ELDSIAREI---IKEYGYGDYFIHSLGHGVGLEIHEWPIRI                    |            | 296        |
| PhPROL    | ---ELDSIARNI---IIAEYGYGEYFNIHSLGHGVGLEIHEWPIRV                  |            | 299        |
| TsPROL    | ---VVDATARGI---IISKYGYGEYFIHRTGHGLGIDVHEEPIYI                   |            | 311        |
| LIXPDII   | ---EVDVAARDI---LITKAGYGEYFNIHRLGHGIGMDVHEEPIYI                  |            | 308        |
| LdPEPQ    | ---ELDGVARKI---IITDAGYGEYFIHRLGHGIGMEVHEEPIYI                   |            | 310        |
| MtXPD     | ---QVDAARDI---VLAEAGLAIFYFIHRTGHGIGLCVHEEPIYI                   |            | 318        |
| XcXPD     | ---AVDQAARAIVLQAAG---LGPDYRLPGLPIHRTGHGICGLAIHEAPYL             |            | 343        |
| ApXPD     | ---SVDIAARKI---VITDGGYGEAFTHRVGHGIGIKAEHSPYL                    |            | 431        |
| DrXPP     | LQGWELDRAARDI---AMGERWAPHFLHRTGHGIDLVQVIGHGAGAN                 |            | 335        |
| AnPEPP    | ---DVHAHAHRVAIRGLLELGILR-GSEDELFDKRI SVAFFPHGLGHYLGMDTHDTGGN    |            | 400        |
| HsPEPDI   | ---DIDRLADRIHLEELAHMGILS-GSVDAMVQAHLGAVFMPHGLGHFLGIDVHDVGGY     |            | 382        |
| EcPEPQ    | ---DYHIQFHQRIAKLLRKHQIITDMSEEAMVENDLTGPFMPHGHGIFLGLQVHDVAGF     |            | 351        |
| AnOPAA    | ---DIHLLAHDGIAQILHDTGMVN-LTPPEIVEMGITRTFFPHGHGIFLGLQVHDVGGF     |            | 351        |
| AsOPAA    | ---ELHLDCHQIRVAQTLSDFNIVD-LSADEIVAKGITSTFFPHGLGHGHLGLQVHDVGGF   |            | 348        |
| AhOPAA    | ---DLHIDCHNRIAQLLSDFDIVK-LPAAEIVERQITSTFFPHGLGHGHLGLQVHDVGGF    |            | 348        |
| PIOPAA    | ---ELHLECHQIRVAQVLSDFNIVK-LPAAEIVERGITSTFFPHGLGHGHLGLQVHDMGGF   |            | 348        |
| Consensus |                                                                 |            |            |





## References

50. Grunden, A.; Ghosh, M.; Schut, G. Proline dipeptidase from *Pyrococcus furiosus*. *Methods Enzymol.* **2001**, *330*, 433–445.
51. Theriot, C.M.; Semcer, R.L.; Shah, S.S.; Grunden, A.M. Improving the catalytic activity of hyperthermophilic *Pyrococcus horikoshii* prolidase for detoxification of organophosphorus nerve agents over a broad range of temperatures. *Archaea* **2011**, *2011*, 565127.
52. DeFrank, J.J.; Cheng, T.C. Purification and properties of an organophosphorus acid anhydrase from a halophilic bacterial isolate. *J. Bacteriol.* **1991**, *173*, 1938–1943.
53. Cheng, T.C.; Harvey, S.P.; Chen, G.L. Cloning and expression of a gene encoding a bacterial enzyme for decontamination of organophosphorus nerve agents and nucleotide sequence of the enzyme. *Appl. Environ. Microbiol.* **1996**, *62*, 1636–1641.
54. Cheng, T.C.; Harvey, S.P.; Stroup, A.N. Purification and properties of a highly active organophosphorus acid anhydrolase from *Alteromonas undina*. *Appl. Environ. Microbiol.* **1993**, *59*, 3138–3140.
55. Wang, T.F.; Chi, M.C.; Lai, K.L.; Lin, M.G.; Chen, Y.Y.; Lo, H.F.; Lin, L.L. High-level expression and molecular characterization of a recombinant prolidase from *Escherichia coli* NovaBlue. *PeerJ* **2018**, *6*, e5863.
56. Booth, M.; Jennings, V.; Fhaolain, I.N.; O’Cuinn, G. Prolidase activity of *Lactococcus lactis* subsp. *cremoris* AM2: partial purification and characterization. *J. Dairy Res.* **1990**, *57*, 245–254.
57. Timofeev, V.; Slutskaya, E.; Gorbacheva, M.; Boyko, K.; Rakitina, T.; Korzhenevskiy, D.; Lipkin, A.; Popov, V. Structure of recombinant prolidase from *Thermococcus sibiricus* in space group P21221. *Acta Crystallogr.* **2015**, *71*, 951–957.
58. Trofimov, A.A.; Slutskaya, E.A.; Polyakov, K.M.; Dorovatovskii, P.V.; Gumerov, V.M.; Popov, V.O. Influence of intermolecular contacts on the structure of recombinant prolidase from *Thermococcus sibiricus*. *Acta Crystallogr.* **2012**, *68*, 1275–1278.
59. Suga, K.; Kabashima, T.; Ito, K.; Tsuru, D.; Okamura, H.; Kataoka, J.; Yoshimoto, T. Prolidase from *Xanthomonas maltophilia*: purification and characterization of the enzyme. *Biosci. Biotechnol. Biochem.* **1995**, *59*, 2087–2090.
60. Chandrasekaran, L.; Belinskaya, T.; Saxena, A. *In vitro* characterization of organophosphorus compound hydrolysis by native and recombinant human prolidase. *Toxicol. in Vitro.* **2013**, *27*, 499–506.

**Disclaimer/Publisher’s Note:** The statements, opinions and data contained in all publications are solely those of the individual author(s) and contributor(s) and not of MDPI and/or the editor(s). MDPI and/or the editor(s) disclaim responsibility for any injury to people or property resulting from any ideas, methods, instructions or products referred to in the content.
